# Supplementary material
Source: HighWire-hosted journal article supplement (https://erj.ersjournals.com/content/58/6/2102238)
Supplement: inline-supplementary-material-1 [file inline-supplementary-material-1.pdf]

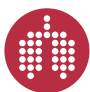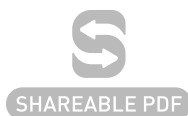

# Targeting AMPK and the Nrf2/HO-1 axis: a promising therapeutic strategy in acute lung injury

Stefan W. Ryter

Proterris Inc., Boston, MA, USA.

Corresponding author: Stefan W. Ryter ([Stefan.Ryter@Proterris.com](mailto:Stefan.Ryter@Proterris.com))

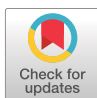

Shareable abstract (@ERSpublications)

Therapeutic targeting of AMPK can improve acute lung injury via upregulation of the cytoprotective enzyme heme oxygenase-1 <https://bit.ly/3DLf1xT>

**Cite this article as:** Ryter SW. Targeting AMPK and the Nrf2/HO-1 axis: a promising therapeutic strategy in acute lung injury. *Eur Respir J* 2021; 58: 2102238 [DOI: 10.1183/13993003.02238-2021].

This single-page version can be shared freely online.

Copyright ©The authors 2021. For reproduction rights and permissions contact [permissions@ersnet.org](mailto:permissions@ersnet.org)

Received: 12 Aug 2021  
Accepted: 30 Aug 2021

Acute lung injury (ALI) is defined as pulmonary conditions leading to severe hypoxaemia, with human acute respiratory distress syndrome (ARDS) representing its most severe manifestation [1]. The primary causes of ARDS are trauma, bacterial and viral pneumonia, sepsis and adverse drug reactions [2]. The development of effective therapeutics for ALI/ARDS remains an urgent unmet need [3]. The overall crude incidence of ALI from all sources has been estimated at 76.9 per 100 000 person-years (86.2 after age adjustment) [4]; or ~200 000 cases per year in the USA [1]. ALI is generally associated with endothelial and epithelial cell injury, loss of alveolar–capillary membrane integrity, neutrophil influx into the lung, and release of pro-inflammatory mediators [1]. Exposure to halogen gases, such as bromine (Br<sub>2</sub>) and chlorine (Cl<sub>2</sub>), as well as to halogenated organic compounds, can cause severe ALI. Although many experimental animal models of ALI have been developed [5], halogen gas-induced ALI has been less widely studied. Halogen gas-induced ALI/ARDS remains a public health concern as it can arise from industrial occupational and accidental exposures. Despite individual case reports, there is a lack of more precise epidemiological data on the incidence of halogen-gas specific ALI [6].
